# Supplementary material
Source: PubMed Central journal article supplement (PMC4282650)
Supplement: NIHMS651732-supplement-Suppl__Table_1.pdf [file NIHMS651732-supplement-Suppl__Table_1.pdf]

**Supplemental Table 1.** Descriptive data for each monkey used in the current study.

| Young Vehicle |      |            |                      |               |             |             | Aged Vehicle |      |            |                      |               |             |             |
|---------------|------|------------|----------------------|---------------|-------------|-------------|--------------|------|------------|----------------------|---------------|-------------|-------------|
| Animal ID     | Age  | Birth Date | Necropsy Weight (kg) | Necropsy Date | Conceptions | Live Births | Animal ID    | Age  | Birth Date | Necropsy Weight (kg) | Necropsy Date | Conceptions | Live Births |
| 27006         | 11.8 | 05/27/92   | 11.8                 | 03/31/04      | 5           | 5           | 17416        | 25.0 | 09/14/77   | 9.9                  | 10/02/02      | 12          | 12          |
| 28392         | 13.3 | 05/15/94   | 7.6                  | 08/21/07      | 4           | 2           | 17676        | 24.0 | 05/09/78   | 10.1                 | 05/29/02      | 8           | 7           |
| 28816         | 10.4 | 04/12/95   | 9.0                  | 09/28/05      | 1           | 0           | 20568        | 23.4 | 01/09/80   | 7.8                  | 07/02/03      | 15          | 12          |
| 28973         | 8.8  | 05/10/95   | 8.9                  | 03/31/04      | 1           | 1           | 28619        | 24.3 | 01/01/78   | 7.1                  | 05/29/02      | 1           | 0           |
| 29357         | 9.0  | 03/26/96   | 10.2                 | 04/13/05      | 1           | 1           | 29177        | 27.9 | 10/01/74   | 9.5                  | 09/11/02      | 0           | 0           |
| 29431         | 8.3  | 04/03/96   | 9.0                  | 07/14/04      | 0           | 0           | 30518        | 23.3 | 04/01/79   | 9.3                  | 07/10/02      | 0           | 0           |
| 30691         | 7.5  | 03/23/98   | 8.9                  | 09/28/05      | 1           | 1           | 31787        | 28.9 | 04/25/74   | 8.8                  | 04/09/03      | 0           | 0           |
| 31998         | 10.2 | 01/01/98   | 5.0                  | 03/04/08      | 4           | 4           | 31796        | 28.3 | 06/28/74   | 7.7                  | 11/13/02      | 0           | 0           |

  

| Young Estradiol |      |            |                      |               |             |             | Aged Estradiol |      |            |                      |               |             |             |
|-----------------|------|------------|----------------------|---------------|-------------|-------------|----------------|------|------------|----------------------|---------------|-------------|-------------|
| Animal ID       | Age  | Birth Date | Necropsy Weight (kg) | Necropsy Date | Conceptions | Live Births | Animal ID      | Age  | Birth Date | Necropsy Weight (kg) | Necropsy Date | Conceptions | Live Births |
| 26326           | 12.8 | 06/12/91   | 10.2                 | 04/21/04      | 6           | 5           | 17164          | 23.4 | 04/17/77   | 9.7                  | 09/24/00      | 11          | 8           |
| 27424           | 14.6 | 04/02/93   | 8.5                  | 11/13/07      | 8           | 7           | 18261          | 23.5 | 03/06/79   | 11.1                 | 10/02/02      | 15          | 13          |
| 27697           | 11.8 | 05/17/93   | 12.3                 | 04/13/05      | 5           | 5           | 20742          | 20.8 | 09/12/82   | 7.6                  | 07/02/03      | 9           | 8           |
| 27723           | 11.1 | 05/21/93   | 11.4                 | 07/14/04      | 4           | 4           | 28594          | 25.3 | 01/01/77   | 9.2                  | 05/08/02      | 1           | 1           |
| 27756           | 12.1 | 05/28/93   | 10.4                 | 07/06/05      | 5           | 5           | 28603          | 25.3 | 01/01/77   | 8.4                  | 05/08/02      | 0           | 0           |
| 28733           | 9.2  | 03/29/95   | 11.3                 | 06/23/04      | 2           | 2           | 29163          | 28.5 | 01/01/74   | 10.7                 | 07/10/02      | 0           | 0           |
| 29265           | 8.3  | 02/28/96   | 5.3                  | 06/23/04      | 2           | 2           | 30519          | 24.4 | 04/01/78   | 9.6                  | 09/11/02      | 0           | 0           |
| 29583           | 9.2  | 04/18/96   | 9.6                  | 07/06/05      | 2           | 1           |                |      |            |                      |               |             |             |
| 29628           | 7.8  | 06/18/96   | 8.2                  | 04/21/04      | 2           | 2           |                |      |            |                      |               |             |             |
| 29704           | 11.8 | 05/05/96   | 8.5                  | 03/04/08      | 4           | 1           |                |      |            |                      |               |             |             |
| 31660           | 8.4  | 04/14/99   | 6.5                  | 09/18/07      | 2           | 2           |                |      |            |                      |               |             |             |
| 31993           | 10.1 | 03/30/98   | 5.3                  | 05/27/08      | 5           | 2           |                |      |            |                      |               |             |             |
| 32987           | 7.0  | 03/22/01   | 6.9                  | 04/01/08      | 2           | 1           |                |      |            |                      |               |             |             |
