# Supplementary material
Source: PubMed Central journal article supplement (PMC4282650)
Supplement: NIHMS651732-supplement-Suppl__Table_2.pdf [file NIHMS651732-supplement-Suppl__Table_2.pdf]

**Supplemental Table 2a.** *p* values for all statistical tests on cell density and %. Dark grey highlights significant effects ( $p \leq 0.05$ ). Light grey highlights indicate trends ( $0.05 < p \leq 0.1$ ).

|                     | ARC                         |                                    |           |       | PERI                        |                                    |           |       |
|---------------------|-----------------------------|------------------------------------|-----------|-------|-----------------------------|------------------------------------|-----------|-------|
|                     | Shapiro-Wilk Normality test | Levene's Equality of Variance Test |           |       | Shapiro-Wilk Normality test | Levene's Equality of Variance Test |           |       |
|                     |                             | Age                                | Treatment | Group |                             | Age                                | Treatment | Group |
| Total Cells         | <b>0.02</b>                 | 0.55                               | 0.38      | 0.80  | 0.36                        | 0.78                               | 0.85      | 0.83  |
| Density GPER        | 0.27                        | 0.62                               | 0.29      | 0.63  | 0.62                        | 0.96                               | 0.77      | 0.94  |
| Density ER $\alpha$ | 0.63                        | 0.91                               | 0.80      | 0.41  | 0.15                        | 0.85                               | 0.58      | 0.67  |
| Density PR          | 0.64                        | 0.30                               | 0.52      | 0.59  | <b>0.01</b>                 | 0.79                               | 0.58      | 0.90  |
| % GPER              | <b>0.01</b>                 | 0.97                               | 0.12      | 0.47  | <b>0.03</b>                 | 0.22                               | 0.89      | 0.69  |
| % ER $\alpha$       | <b>0.04</b>                 | 0.76                               | 0.22      | 0.46  | <b>0.03</b>                 | 0.58                               | 0.85      | 0.55  |
| % PR                | 0.19                        | 0.30                               | 0.59      | 0.74  | <b>0.00</b>                 | 0.33                               | 0.78      | 0.60  |

|                     | ARC                          |             |       |                                                                   |           |             |           |           |           |
|---------------------|------------------------------|-------------|-------|-------------------------------------------------------------------|-----------|-------------|-----------|-----------|-----------|
|                     | Kruskal-Wallis Rank Sum test |             |       | Pairwise Wilcoxon Rank Sum with Benjamini and Hochberg Adjustment |           |             |           |           |           |
|                     | Age                          | Treatment   | Group | YV vs. AV                                                         | YE vs. AE | YV vs. YE   | AV vs. AE | YV vs. AE | YE vs. AV |
| Total Cells         | 0.64                         | 0.89        | 0.96  | -                                                                 | -         | -           | -         | -         | -         |
| Density GPER        | <b>0.07</b>                  | 0.95        | 0.35  | 0.23                                                              | 0.34      | 0.75        | 0.94      | 0.38      | 0.11      |
| Density ER $\alpha$ | 0.44                         | <b>0.08</b> | 0.24  | 0.39                                                              | 0.78      | <b>0.05</b> | 0.65      | 0.13      | 0.42      |
| Density PR          | 0.11                         | 0.24        | 0.29  | -                                                                 | -         | -           | -         | -         | -         |
| % GPER              | 0.25                         | 0.55        | 0.60  | -                                                                 | -         | -           | -         | -         | -         |
| % ER $\alpha$       | 0.76                         | 0.90        | 0.96  | -                                                                 | -         | -           | -         | -         | -         |
| % PR                | 0.11                         | 0.19        | 0.31  | -                                                                 | -         | -           | -         | -         | -         |

|                     | PERI                         |             |             |                                                                   |             |           |           |             |             |
|---------------------|------------------------------|-------------|-------------|-------------------------------------------------------------------|-------------|-----------|-----------|-------------|-------------|
|                     | Kruskal-Wallis rank sum test |             |             | Pairwise Wilcoxon Rank Sum with Benjamini and Hochberg Adjustment |             |           |           |             |             |
|                     | Age                          | Treatment   | Group       | YV vs. AV                                                         | YE vs. AE   | YV vs. YE | AV vs. AE | YV vs. AE   | YE vs. AV   |
| Total Cells         | 0.46                         | 0.35        | 0.68        | -                                                                 | -           | -         | -         | -           | -           |
| Density GPER        | <b>0.01</b>                  | 0.62        | <b>0.04</b> | 0.40                                                              | <b>0.01</b> | 0.40      | 0.22      | <b>0.10</b> | 0.21        |
| Density ER $\alpha$ | 0.30                         | 0.47        | 0.44        | -                                                                 | -           | -         | -         | -           | -           |
| Density PR          | 0.98                         | 0.13        | 0.47        | -                                                                 | -           | -         | -         | -           | -           |
| % GPER              | <b>0.06</b>                  | 0.74        | 0.16        | 0.83                                                              | <b>0.03</b> | 0.53      | 0.42      | 0.19        | 0.30        |
| % ER $\alpha$       | 0.28                         | 0.41        | 0.57        | -                                                                 | -           | -         | -         | -           | -           |
| % PR                | 0.54                         | <b>0.10</b> | 0.42        | 0.93                                                              | 1.00        | 0.46      | 0.39      | 0.51        | <b>0.08</b> |

**Supplemental Table 2b.** *p* values for all statistical tests on GPER cell size. Dark grey highlights significant effects ( $p \leq 0.05$ ). Light grey highlights indicate trends ( $0.05 < p < 0.1$ ).

| Cell Size  | ARC                          |           |       |                                                                   |             |           |           |             |           |
|------------|------------------------------|-----------|-------|-------------------------------------------------------------------|-------------|-----------|-----------|-------------|-----------|
|            | Kruskal-Wallis rank sum test |           |       | Pairwise Wilcoxon Rank Sum with Benjamini and Hochberg Adjustment |             |           |           |             |           |
|            | Age                          | Treatment | Group | YV vs. AV                                                         | YE vs. AE   | YV vs. YE | AV vs. AE | YV vs. AE   | YE vs. AV |
| 0 - 49     | 1.00                         | 0.17      | 0.59  | -                                                                 | -           | -         | -         | -           | -         |
| 50 - 99    | 0.46                         | 0.76      | 0.87  | -                                                                 | -           | -         | -         | -           | -         |
| 100 - 149  | <b>0.07</b>                  | 0.15      | 0.14  | 0.47                                                              | <b>0.08</b> | 0.36      | 0.13      | <b>0.09</b> | 0.65      |
| 150 - 199  | 0.17                         | 0.39      | 0.44  | -                                                                 | -           | -         | -         | -           | -         |
| 200 - 249  | <b>0.09</b>                  | 0.62      | 0.40  | 0.23                                                              | 0.31        | 0.78      | 0.69      | 0.22        | 0.41      |
| 250 - 299  | 0.28                         | 0.62      | 0.71  | -                                                                 | -           | -         | -         | -           | -         |
| 300 - 349  | 0.59                         | 0.27      | 0.66  | -                                                                 | -           | -         | -         | -           | -         |
| 350 - 399  | 0.34                         | 0.41      | 0.66  | -                                                                 | -           | -         | -         | -           | -         |
| $\geq 400$ | 0.28                         | 0.73      | 0.71  | -                                                                 | -           | -         | -         | -           | -         |

| Cell Size  | PERI                         |             |             |                                                                   |             |             |           |           |             |
|------------|------------------------------|-------------|-------------|-------------------------------------------------------------------|-------------|-------------|-----------|-----------|-------------|
|            | Kruskal-Wallis rank sum test |             |             | Pairwise Wilcoxon Rank Sum with Benjamini and Hochberg Adjustment |             |             |           |           |             |
|            | Age                          | Treatment   | Group       | YV vs. AV                                                         | YE vs. AE   | YV vs. YE   | AV vs. AE | YV vs. AE | YE vs. AV   |
| 0 - 49     | 0.27                         | 0.49        | 0.59        | -                                                                 | -           | -           | -         | -         | -           |
| 50 - 99    | <b>0.07</b>                  | 0.25        | 0.13        | 0.32                                                              | <b>0.07</b> | 0.11        | 0.62      | 0.75      | <b>0.07</b> |
| 100 - 149  | 0.66                         | 0.90        | 0.97        | -                                                                 | -           | -           | -         | -         | -           |
| 150 - 199  | 0.11                         | <b>0.09</b> | <b>0.06</b> | 0.65                                                              | <b>0.07</b> | <b>0.02</b> | 0.52      | 1.00      | <b>0.03</b> |
| 200 - 249  | 0.36                         | 0.66        | 0.71        | -                                                                 | -           | -           | -         | -         | -           |
| 250 - 299  | 0.30                         | 0.73        | 0.54        | -                                                                 | -           | -           | -         | -         | -           |
| 300 - 349  | 0.73                         | 0.77        | 0.96        | -                                                                 | -           | -           | -         | -         | -           |
| 350 - 399  | 0.46                         | 0.35        | 0.68        | -                                                                 | -           | -           | -         | -         | -           |
| $\geq 400$ | 0.61                         | 0.90        | 0.49        | -                                                                 | -           | -           | -         | -         | -           |

**Supplemental Table 2c.** *p* values for correlation networks. Pearson's *r* values (top) are highlighted in grey. All *p* values < 0.1 are bolded. Italicized *p* values also passed the Benjamini and Hochberg false discovery rate correction (ARC  $p \leq 0.01$ , PERI  $p \leq 0.03$ ). Cell density, %, and total cells # were highly correlated therefore we included only % ir-cells for simplicity sake.

| ARC                         |             |             |              |             |               |             |              |                           |
|-----------------------------|-------------|-------------|--------------|-------------|---------------|-------------|--------------|---------------------------|
| Correlation <i>p</i> values | # Births    | Weight (Kg) | Age (Months) | % GPER      | % ER $\alpha$ | % PR        | % Large GPER | Pearson's <i>r</i> values |
| # Births                    | \           | 0.26        | 0.29         | <b>0.49</b> | 0.36          | 0.36        | -0.51        | # Births                  |
| Weight (Kg)                 | 0.23        | \           | 0.02         | 0.22        | 0.35          | 0.20        | -0.21        | Weight (Kg)               |
| Age (Months)                | 0.35        | 0.40        | \            | 0.21        | 0.17          | 0.08        | <b>0.47</b>  | Age (Months)              |
| % GPER                      | <b>0.04</b> | 0.43        | 0.34         | \           | <b>0.54</b>   | <b>0.58</b> | -0.06        | % GPER                    |
| % ER $\alpha$               | 0.13        | 0.16        | 0.56         | <b>0.01</b> | \             | <b>0.71</b> | -0.24        | % ER $\alpha$             |
| % PR                        | 0.11        | 0.82        | 0.18         | <b>0.07</b> | <b>0.00</b>   | \           | -0.23        | % PR                      |
| % Large GPER                | 0.34        | 0.85        | <b>0.01</b>  | 0.54        | 0.48          | 0.65        | \            | % Large GPER              |

| PERI          |             |             |              |             |               |             |              |                           |
|---------------|-------------|-------------|--------------|-------------|---------------|-------------|--------------|---------------------------|
| Correlation   | # Births    | Weight (Kg) | Age (Months) | % GPER      | % ER $\alpha$ | % PR        | % Large GPER | Pearson's <i>r</i> values |
| # Births      | \           | 0.13        | 0.31         | <b>0.61</b> | <b>0.55</b>   | <b>0.40</b> | 0.39         | # Births                  |
| Weight (Kg)   | 0.23        | \           | 0.08         | <b>0.53</b> | <b>0.32</b>   | 0.19        | -0.11        | Weight (Kg)               |
| Age (Months)  | 0.35        | 0.40        | \            | <b>0.33</b> | 0.10          | 0.20        | <b>0.35</b>  | Age (Months)              |
| % GPER        | <b>0.01</b> | <b>0.02</b> | <b>0.03</b>  | \           | <b>0.74</b>   | <b>0.59</b> | <b>0.35</b>  | % GPER                    |
| % ER $\alpha$ | <b>0.00</b> | <b>0.04</b> | 0.33         | <b>0.00</b> | \             | <b>0.84</b> | -0.11        | % ER $\alpha$             |
| % PR          | <b>0.05</b> | 0.52        | 0.70         | <b>0.01</b> | <b>0.00</b>   | \           | -0.07        | % PR                      |
| % Large GPER  | 0.34        | 0.58        | <b>0.00</b>  | <b>0.08</b> | 0.97          | 0.60        | \            | % Large GPER              |

\ = Not Applicable.
